# Supplementary material
Source: PubMed Central journal article supplement (PMC7722688)

## Supplementary Appendix

This appendix has been provided by the authors to give readers additional information about their work.

Supplement to: Kennedy BS, Richeson RP, Houde AJ. Risk factors for SARS-CoV-2 in a statewide correctional system. *N Engl J Med*. DOI: 10.1056/NEJMc2029354

## SUPPLEMENTARY APPENDIX

### TABLE OF CONTENTS

|                                                                                                                                                                                          |         |
|------------------------------------------------------------------------------------------------------------------------------------------------------------------------------------------|---------|
| Background .....                                                                                                                                                                         | Page 2  |
| Methods .....                                                                                                                                                                            | Page 2  |
| Results.....                                                                                                                                                                             | Page 5  |
| Discussion.....                                                                                                                                                                          | Page 6  |
| Identifying Data.....                                                                                                                                                                    | Page 9  |
| Acknowledgments.....                                                                                                                                                                     | Page 10 |
| References .....                                                                                                                                                                         | Page 10 |
| Table S1. Baseline Characteristics of Study Population, Connecticut Department of Correction, 2020 .....                                                                                 | Page 13 |
| Table S2. Univariate and Multivariate Logistic Regression Analyses for SARS-CoV-2 Prevalence, Hospitalization, ICU Admission and Death, Connecticut Department of Correction, 2020 ..... | Page 15 |
| Figure S1. Inmate SARS-CoV-2 Testing, Connecticut Department of Correction, 2020 .....                                                                                                   | Page 18 |

## Risk Factors for SARS-CoV-2 in a Statewide Correctional System

### BACKGROUND

Following a respiratory disease outbreak in Wuhan, China, severe acute respiratory syndrome coronavirus 2 (SARS-CoV-2) was confirmed as the pathogen causing novel coronavirus disease 2019 (COVID-19).<sup>1</sup> Prior reports have suggested that congregate settings are high-risk environments for the transmission and complications of COVID-19, but multivariate analyses identifying risk factors in these populations are lacking.<sup>2 3 4 5 6 7 8</sup> Worldwide, about 10.4 million individuals are incarcerated with the most being in the United States (about 2.2 million), many of whom are medically vulnerable due to preexisting chronic conditions and at high-risk for infectious diseases, including COVID-19.<sup>9 10 11 12</sup> In this study, we performed multivariate analyses to identify individual and facility-level risk factors associated with SARS-CoV-2 prevalence and outcomes in a statewide correctional population that underwent nearly universal testing.

### METHODS

#### Study Population

The Connecticut Department of Correction (CTDOC) is an integrated correctional system that includes prisons and jails, which house mainly sentenced and unsentenced inmates, respectively. CTDOC is comprised of 17 facilities located throughout the state with a combined average daily census of nearly

ten thousand. Onsite clinical staff provide general medical care to the inmate patient population, with outside referrals made as needed for emergency and/or specialty care.

### Laboratory Testing

In March 2020, CTDOC issued initial clinical guidelines for COVID-19 testing of symptomatic patients (e.g., fever, cough, shortness of breath). For suspected cases, nasopharyngeal specimens were collected and real-time reverse transcriptase-polymerase chain reaction (rRT-PCR) for SARS-CoV-2 was performed by Quest Diagnostics Laboratory.<sup>13 14</sup> On March 13<sup>th</sup>, the first confirmed COVID case among CTDOC inmates was identified. Since the initial roll-out of clinical guidelines for the agency, symptom-based testing has been ongoing. However, in mid-May, mass testing began of all assenting inmates and continued through the end of June, with final follow-up through mid-July. By the end of this point-prevalence survey, the cumulative total tested was 10,304.

### Data Variables

This study considered the following outcomes: SARS-CoV-2 prevalence; subsequent hospitalization; intensive care unit (ICU) admission; and death. Potential covariates included age, sex, race/ethnicity and chronic conditions identified through the electronic health record (hypertension, heart disease [coronary artery disease, congestive heart failure, atrial fibrillation], diabetes mellitus, lung disease [asthma, chronic obstructive pulmonary disease, chronic fibrosis], liver disease, cancer, HIV, autoimmune disease [systemic lupus erythematosus, rheumatoid arthritis, inflammatory bowel disease, multiple sclerosis]) as well as body mass index. Facility-level factors were also considered: type of

facility (prison, jail, or both) and predominant housing category at a given facility (cell, dormitory, or both).

#### Follow-up

For the study population, individuals had 14 or more days of follow-up. Laboratory-confirmed SARS-CoV-2 cases were considered recovered if they were afebrile without antipyretics for at least 72 hours, other symptoms had improved, and it had been at least 14 days since symptom onset, or 14 days since testing if asymptomatic.

#### Data Analysis

To determine the risk factors associated with each outcome, logistic regression analysis was performed using Stata version 12 (College Station, Texas, 2011). First, odds ratios (ORs) and 95% confidence intervals (CIs) were determined for each outcome and covariate combination using the “*penlogit*” command for penalized likelihood estimation as previously described (univariate fixed effects).<sup>15</sup> For example:

*penlogit* outcome1 covariate1, or

Second, all covariates with an OR 95% CI excluding one were entered into a multivariate model for the given outcome (multivariate fixed effects). For example:

*penlogit* outcome1 covariate1 covariate2, or

Third, random-effects intercept terms for housing and facility were added to these multivariate models in order to account for potential clustering in the data (multivariate mixed effects) using the “*xtmelogit*” command. For example:

```
xtmelogit outcome1 covariate1 covariate2 || cluster1: || cluster2: , or
```

These models were compared with corresponding multivariate models that included only one random-effects intercept term—that is, for facility. The latter models showed better fit with the data, based on lower AIC and BIC values. Therefore, these were the final multilevel models and associations are reported as ORs with 95% CIs. The widths of confidence intervals have not been adjusted for multiplicity and should not be used to draw inferences about definite associations. Regression models for the outcome, SARS-CoV-2 prevalence, included the male study population only (n = 9,699), since no female inmates tested positive. For the hospitalization, ICU admission, and death outcomes, the regression models included only those individuals testing positive for SAR-CoV-2 (n = 1,240).

## RESULTS

The number tested for SARS-CoV-2 increased steadily once mass screening began in mid-May (Figure S1), for a cumulative total 10,304. Based on the daily census population at the start of the study, this represents a testing percentage of about 84%. Baseline characteristics of the tested population are shown in Table S1. We identified 1,240 individuals (12%) who tested positive for SARS-CoV-2 and none were female. The positivity rate was higher during the symptom-based-only testing phase (Figure S1).

Among the SARS-CoV-2 positive males, there were: 62 hospitalizations (5%), 20 ICU admissions (1.6%), and 7 deaths (0.6%).

The logistic regression analyses are summarized in Table S2. The strongest risk factor of SARS-CoV-2 prevalence was dormitory-based housing (OR 35.3, 95% CI 7.9 – 157). Hispanic/Latino ethnicity (OR 1.4 [1.2 – 1.6]) and increasing age (OR 1.2 per decade [1.1 – 1.2]) increased the likelihood of positivity.

Among positive cases, the strongest predictor of hospitalization was preexisting heart disease (OR 7.2 [2.8 – 18.5]). Increasing age (OR 2.3 [1.9 – 2.9]) and dormitory housing (OR 0.22 [0.06 – 0.74]) were also associated with hospitalization. Autoimmune disease (OR 13.5 [2.2 – 82.6]), heart disease (OR 7.7 [1.8 – 33.6]), and age (OR 2.4 [1.6 – 3.5]) predicted ICU admission. The only risk factor associated with death was age (OR 3.3 [1.7 – 6.3]).

## DISCUSSION

There were a number of important findings in this study. Surprisingly, while more than six hundred female inmates were tested, not a single confirmed case of SARS-CoV-2 was identified. The reasons for this are unclear. At CTDOC, all female inmates are housed in a single facility and, therefore, do not transfer between other facilities, unlike those housing male inmates, which have frequent transfers. Consequently, this may have reduced the likelihood of introducing SARS-CoV-2 into the facility. Additionally, given its structural design, the inmates at this facility may have more outdoor exposure, restricted movement between housing units, and space to promote social distancing.

Among males, we found that the strongest risk factor for SARS-CoV-2 prevalence was residing in a facility that primarily housed inmates in dormitory units. This finding may suggest that social distancing

in the former is more challenging. A previous report of inmates observed that the prevalence of SARS-CoV-2 was higher in dormitory-based than cell-based housing, but statistical testing was not performed due to the heterogeneous data sources.<sup>8</sup> Together, our data support current guidelines from the Centers for Disease Control and Prevention (CDC) that call for preferentially using cells, when available and feasible, for medical isolation and quarantine, to reduce SARS-CoV-2 transmission risk.<sup>16</sup> We also observed that dormitory-based housing was protective for hospitalization. This may suggest that sicker inmates from dormitories were identified early and housed in cells prior to testing and subsequent hospitalization.

Interestingly, we found race/ethnicity only weakly associated with SARS-CoV-2 infection but not associated with subsequent outcomes. Others have reported stronger associations by comparing the racial/ethnic proportions of SARS-CoV-2 cases with corresponding proportions in the general population from counties identified as hotspots.<sup>17</sup> However, the estimates of association from this prior study were not derived from population-based testing designs and, therefore, may have been subject to bias. Nevertheless, our findings may suggest that the testing and prevention efforts at CTDOC, as an integrated correctional system, reduced potential disparities compared with the general population.

This study found age weakly associated with SARS-CoV-2 positivity and moderately associated with all SARS-CoV-2 outcomes examined. Prior multivariate analyses have observed an increased risk of serious illness and complications from COVID with increasing age.<sup>18 19 20</sup> To our knowledge, the current study is the first published report demonstrating an effect of age on the likelihood of SARS-CoV-2 infection for a congregate population that underwent nearly universal testing not part of an outbreak investigation.



Importantly, of the conditions considered, only preexisting heart and autoimmune diseases were found to be associated with SARS-CoV-2 outcomes. Indeed, heart disease strongly predicted subsequent hospitalization and ICU admission; while autoimmune disease very strongly predicted ICU admission. These findings are consistent with previous reports suggesting more serious SARS-CoV-2 complications for individuals with these two conditions.<sup>19 21</sup> The lack of other comorbidities identified as predictors may reflect the younger age distribution in our study population. Further, our COVID cases were closely monitored at their facilities, including 24-hour nursing and daily clinician availability, with interventions (e.g., supplemental oxygen, EKG) provided as medically indicated. Notably, the crude case fatality rate for CTDOC was less than that from correctional facilities nationwide (0.6% vs 1.3%).<sup>4</sup>

The prevalence of some chronic conditions was somewhat lower when compared with data from a national survey of incarcerated persons but similar to standardized general population estimates.<sup>11</sup> The prior investigation's reliance on inmate self-reports rather than medical chart review may have contributed to these observed differences. Additionally, during the current COVID pandemic in Connecticut, fewer individuals have been incarcerated and eligible inmates have been released early from CTDOC, in part, due to their medical vulnerability.

This study has several potential limitations. First, data were not available for correctional staff, who may serve as potential sources of COVID exposure to inmates. However, CTDOC took steps to mitigate this impact, including temperature checks and symptom screening of all staff before entry into a facility. Further, staff and inmates were provided with facemasks and required to wear them, especially when social distancing was not possible following an order from the governor of Connecticut, while group activities and external visits were suspended. Second, the possibility of missing prior asymptomatic cases that already cleared the virus at the time of testing cannot be excluded. Inmates who were COVID

positive and/or symptomatic were medically isolated for 14 days; exposed inmates were medically quarantined for 14 days in a different location. Together, these and other measures likely reduced the risk of spread, even among those not identified through testing. Third, the findings reported here may not be generalizable to all correctional facilities. However, our testing percentage was greater than 80%, which reduced the risk of selection bias, and the statistical analysis minimized the likelihood of spurious associations.

The experience of CTDOC suggests that both inmate and facility-level factors are associated with SARS-CoV-2. For correctional facilities in the United States as well as other countries, taking steps to ensure social distancing in dormitory housing, along with testing will likely enhance prevention efforts.

Additionally, identifying medically vulnerable inmates with SARS-CoV-2, including the elderly and/or those with cardiac and autoimmune conditions, will allow for closer monitoring and prompt intervention for those at high-risk for clinical deterioration.

#### IDENTIFYING DATA

One of the authors (BSK) performed the data analysis. All authors had access to the data as well as autonomy regarding this study's conception, analysis, interpretation, and manuscript writing. This work was conducted as part of CTDOC's public health response to the COVID-19 pandemic and did not require research protocol IRB approval.

## ACKNOWLEDGEMENTS

The authors would like to thank all the dedicated frontline clinical and custody staff from CTDOC who worked tirelessly in providing the agency's public health response during this COVID-19 pandemic. Additionally, we are grateful to a number of staff who contributed to this work in various ways, including data collection, analysis, review, and interpretation: France Boyko; Ronald Cotta, Director of Operations; Kamila Glascoff; Mariam V. Grant, RN; Keisha Johnson, LPN; Timothy Johnson, Captain of Operations; Eulah Lacey, RN; Mary Lansing, Associate Research Analyst; Samantha Lockery; Renee Mateyov; Trina Sexton, Warden of York Correctional Institution; Mariya Zea, RN; and Malgorzata Zukowska, RN. We are also thankful to Kelly Marie McNamara, Quest Diagnostics Laboratory, for ongoing COVID testing support. Finally, the authors would like to thank the anonymous peer-reviewers for their helpful comments.

## REFERENCES

- 
1. Zhu N, Zhang D, Wang W, et al. A novel coronavirus from patients with pneumonia in China, 2019. *N Engl J Med* 2020;382:727-33.
  2. McMichael TM, Currie DW, Clark S, et al. Epidemiology of Covid-19 in a long-term care facility in King County, Washington. *N Engl J Med* 2020;382:2005-11.
  3. Arons MM, Hatfield KM, Reddy SC, et al. Presymptomatic SARS-CoV-2 infections and transmission in a skilled nursing facility. *N Engl J Med* 2020;382:2081-90.
  4. Wallace M, Hagan L, Curran KG, et al. COVID-19 in correctional and detention facilities—United States, February – April 2020. *MMWR Morb Mortal Wkly Rep* 2020;69:587-90.
  5. Njuguna H, Wallace M, Simonson S, et al. Serial laboratory testing for SARS-CoV-2 infection among incarcerated and detained persons in a correctional and detention facility—Louisiana, April – May 2020. *MMWR Morb Mortal Wkly Rep* 2020;69:836-40.

- 
6. Saloner B, Parish K, Ward JA, et al. COVID-19 cases and deaths in federal and state prisons. *JAMA* 2020;e1-e2 (published online July 8, 2020).
  7. Hatfield KM, Reddy SC, Forsberg K, et al. Facility-wide testing for SARS-CoV-2 in nursing homes—seven U.S. jurisdictions, March – June 2020. *MMWR Morb Mortal Wkly Rep* 2020;69:1094-98.
  8. Hagan LM, Williams SP, Spaulding AC, et al. Mass testing for SARS-CoV-2 in 16 prisons and jails—six jurisdictions, United States, April – May 2020. *MMWR Morb Mortal Wkly Rep* 2020;69:1139-43.
  9. Walmsley R. World prison population list, eleventh edition. London, England: Institute for Criminal Policy Research. 2015.  
([https://www.prisonstudies.org/sites/default/files/resources/downloads/world\\_prison\\_population\\_list\\_11th\\_edition\\_0.pdf](https://www.prisonstudies.org/sites/default/files/resources/downloads/world_prison_population_list_11th_edition_0.pdf)).
  10. Kaeble D, Cowhig M. Correctional populations in the United States, 2016. Washington, DC: US Department of Justice, Bureau of Justice Statistics. April 2018. (<https://www.bjs.gov/content/pub/pdf/cpus16.pdf>).
  11. Maruschak LM, Berzofsky M, Unangst J. Medical problems of state and federal prisoners and jail inmates, 2011-12. Washington, DC: US Department of Justice, Bureau of Justice Statistics. February 2015.  
(<https://bjs.gov/content/pub/pdf/mpsfpi1112.pdf>).
  12. Akiyama MJ, Spaulding AC, Rich JD. Flattening the curve for incarcerated populations—Covid-19 in jails and prisons. *N Engl J Med* 2020;382:2075-77.
  13. Centers for Disease Control and Prevention. CDC 2019-novel coronavirus (2019-nCoV) real-time RT-PCR diagnostic panel. 2020 (<https://www.fda.gov/media/134922/download>).
  14. Centers for Disease Control and Prevention. 2019-Novel coronavirus (2019-nCov) real-time rRT-PCR panel primers and probes. 2020 (<https://www.cdc.gov/coronavirus/2019-ncov/downloads/rt-pcr-panel-primer-probes.pdf>).
  15. Discacciati A, Orsini N, Greenland. Approximate Bayesian logistic regression via penalized likelihood by data augmentation. *Stata Journal* 2015;15:712-36.  
(<https://journals.sagepub.com/doi/pdf/10.1177/1536867X1501500306>).
  16. Centers for Disease Control and Prevention. Interim guidance on the management of coronavirus disease 2019 (COVID-19) in correctional and detention facilities. 2020 (<https://www.cdc.gov/coronavirus/2019-ncov/community/correction-detention/guidance-correctional-detention.html>).
  17. Moore JT, Riscaldi JN, Rose CE, et al. Disparities in incidence of COVID-19 among underrepresented racial/ethnic groups in counties identified as hotspots during June 5-18, 2020 – 22 States, February – June 2020. *MMWR Morb Mortal Wkly Rep* 2020;69:1122-26.
  18. Zhou F, Yu T, Du R, et al. Clinical course and risk factors for mortality of adult inpatients with COVID-19 in Wuhan, China: a retrospective cohort study. *Lancet* 2020;395:1054-62.
  19. Petrilli CM, Jones SA, Yang J, et al. Factors associated with hospital admission and critical illness among 5279 people with coronavirus disease 2019 in New York City: prospective cohort study. *BMJ* 2020;369:m1966.

---

20. Cummings MJ, Baldwin MR, Abrams D, et al. Epidemiology, clinical course, and outcomes of critically ill adults with COVID-19 in New York City: a prospective cohort study. *Lancet* 2020;395:1763-70.

21. Freites Nuñez DD, Leon L, Mucientes A, et al. Risk factors for hospital admission related to COVID-19 in patients with autoimmune inflammatory rheumatic diseases. *Ann Rheum Dis* 2020. doi:10.1136/annrheumdis-2020-217984.

TABLE S1. Baseline Characteristics of Study Population, Connecticut  
Department of Correction, 2020.

| Variable               | Total = 10,304<br>N (%) |
|------------------------|-------------------------|
| Age, years             |                         |
| Mean ( $\pm$ SD)       | 38.0 ( $\pm$ 11.8)      |
| Sex                    |                         |
| Male                   | 9,699 (94)              |
| Female                 | 605 (6)                 |
| Race/Ethnicity*        |                         |
| White                  | 2,895 (28)              |
| Black/African American | 4,526 (44)              |
| Hispanic/Latino        | 2,804 (27)              |
| Other                  | 79 (1)                  |
| Chronic comorbidities  |                         |
| Hypertension           | 1,627 (16)              |
| Heart disease          | 294 (3)                 |
| Diabetes mellitus      | 604 (6)                 |
| Lung disease           | 979 (10)                |
| Liver disease          | 572 (6)                 |
| Cancer                 | 91 (1)                  |
| HIV                    | 100 (1)                 |

|                                    |            |
|------------------------------------|------------|
| Autoimmune disease                 | 96 (1)     |
| Body mass index, kg/m <sup>2</sup> |            |
| < 25                               | 4,202 (41) |
| 25 – 29                            | 3,754 (36) |
| ≥ 30                               | 2,348 (23) |
| Facility                           |            |
| Prison                             | 6,468 (63) |
| Jail                               | 2,309 (22) |
| Both                               | 1,527 (15) |
| Housing                            |            |
| Cell                               | 4,493 (44) |
| Dormitory                          | 2,089 (20) |
| Both                               | 3,722 (36) |
|                                    |            |

\*Other includes Native American and Asian. Percentages may not add to 100 due to rounding.

TABLE S2. Univariate and Multivariate Logistic Regression Analyses for SARS-CoV-2 Prevalence, Hospitalization, ICU Admission and Death, Connecticut Department of Correction, 2020.

| Variable                      | Model 1<br>SARS-CoV-2 Prevalence    |                                  |                                  | Model 2<br>Hospitalization       |                                  |                                  | Model 3<br>ICU Admission         |                                  |                                  | Model 4<br>Death                 |                                  |                                  |
|-------------------------------|-------------------------------------|----------------------------------|----------------------------------|----------------------------------|----------------------------------|----------------------------------|----------------------------------|----------------------------------|----------------------------------|----------------------------------|----------------------------------|----------------------------------|
|                               | Univariate<br>Fixed<br>Effects      | Multivariate<br>Fixed<br>Effects | Multivariate<br>Mixed<br>Effects | Univariate<br>Fixed<br>Effects   | Multivariate<br>Fixed<br>Effects | Multivariate<br>Mixed<br>Effects | Univariate<br>Fixed<br>Effects   | Multivariate<br>Fixed<br>Effects | Multivariate<br>Mixed<br>Effects | Univariate<br>Fixed<br>Effects   | Multivariate<br>Fixed<br>Effects | Multivariate<br>Mixed<br>Effects |
|                               | OR<br>(95% CI)                      | OR<br>(95% CI)                   | OR<br>(95% CI)                   | OR<br>(95% CI)                   | OR<br>(95% CI)                   | OR<br>(95% CI)                   | OR<br>(95% CI)                   | OR<br>(95% CI)                   | OR<br>(95% CI)                   | OR<br>(95% CI)                   | OR<br>(95% CI)                   | OR<br>(95% CI)                   |
| Age, per 10-<br>year increase | <b>1.2</b><br><b>(1.1 – 1.2)</b>    | <b>1.2</b><br><b>(1.1 – 1.3)</b> | <b>1.2</b><br><b>(1.1 – 1.2)</b> | <b>2.4</b><br><b>(1.9 – 2.9)</b> | <b>2.4</b><br><b>(1.9 – 3.0)</b> | <b>2.3</b><br><b>(1.9 – 2.9)</b> | <b>2.6</b><br><b>(1.9 – 3.6)</b> | <b>2.6</b><br><b>(1.8 – 3.7)</b> | <b>2.4</b><br><b>(1.6 – 3.5)</b> | <b>3.4</b><br><b>(1.9 – 6.1)</b> | <b>3.4</b><br><b>(1.9 – 6.1)</b> | <b>3.3</b><br><b>(1.7 – 6.3)</b> |
| Race/<br>ethnicity            |                                     |                                  |                                  |                                  |                                  |                                  |                                  |                                  |                                  |                                  |                                  |                                  |
| White                         | 1                                   | 1                                | 1                                | 1                                |                                  |                                  | 1                                |                                  |                                  | 1                                |                                  |                                  |
| Black/African<br>American     | <b>0.76</b><br><b>(0.66 – 0.88)</b> | 0.92<br>(0.78 – 1.1)             | 0.97<br>(0.82 – 1.1)             | 0.78<br>(0.42 – 1.4)             |                                  |                                  | 1.1<br>(0.40 – 3.2)              |                                  |                                  | 3.0<br>(0.34 – 27.3)             |                                  |                                  |
| Hispanic/<br>Latino           | 1.1<br>(0.96 – 1.3)                 | <b>1.3</b><br><b>(1.2 – 1.6)</b> | <b>1.4</b><br><b>(1.2 – 1.6)</b> | 0.78<br>(0.42 – 1.5)             |                                  |                                  | 0.73<br>(0.22 – 2.4)             |                                  |                                  | 1.8<br>(0.16 – 19.5)             |                                  |                                  |
| Other                         | 0.47<br>(0.19 – 1.2)                | 0.52<br>(0.20 – 1.3)             | 0.52<br>(0.20 – 1.4)             | 5.7 E-6<br>(0 – ∞)               |                                  |                                  | 7.5 E-6<br>(0 – ∞)               |                                  |                                  | 4.8 E-5<br>(0 – ∞)               |                                  |                                  |



|                                       |                                  |                     |                     |                                   |                                   |                                   |                                    |                                    |                                    |                      |  |  |
|---------------------------------------|----------------------------------|---------------------|---------------------|-----------------------------------|-----------------------------------|-----------------------------------|------------------------------------|------------------------------------|------------------------------------|----------------------|--|--|
| Hypertension                          | 1.2<br>(0.99 – 1.4)              |                     |                     | 1.4<br>(0.74 – 2.5)               |                                   |                                   | 2.0<br>(0.76 – 5.3)                |                                    |                                    | 0.77<br>(0.09 – 6.4) |  |  |
| Heart disease                         | 1.2<br>(0.85 – 1.7)              |                     |                     | <b>6.1</b><br><b>(2.8 – 13.4)</b> | <b>6.8</b><br><b>(2.7 – 17.3)</b> | <b>7.2</b><br><b>(2.8 – 18.5)</b> | <b>8.0</b><br><b>(2.5 – 25.1)</b>  | <b>6.6</b><br><b>(1.7 – 25.3)</b>  | <b>7.7</b><br><b>(1.8 – 33.6)</b>  | 1.9 E-6<br>(0 – ∞)   |  |  |
| Diabetes<br>mellitus                  | 0.93<br>(0.72 – 1.2)             |                     |                     | 1.5<br>(0.59 – 3.9)               |                                   |                                   | 1.9<br>(0.43 – 8.4)                |                                    |                                    | 6.8 E-7<br>(0 – ∞)   |  |  |
| Lung disease                          | 1.1<br>(0.90 – 1.3)              |                     |                     | <b>2.2</b><br><b>(1.1 – 4.2)</b>  | 1.7<br>(0.81 – 3.6)               | 1.7<br>(0.80 – 3.5)               | 0.96<br>(0.22 – 4.2)               |                                    |                                    | 6.4 E-7<br>(0 – ∞)   |  |  |
| Liver disease                         | 1.0<br>(0.80 – 1.3)              |                     |                     | 0.83<br>(0.25 – 2.7)              |                                   |                                   | 0.86<br>(0.11 – 6.6)               |                                    |                                    | 6.8 E-7<br>(0 – ∞)   |  |  |
| Cancer                                | 1.5<br>(0.87 – 2.6)              |                     |                     | 1.3<br>(0.16 – 9.8)               |                                   |                                   | 6.0 E-6<br>(0 – ∞)                 |                                    |                                    | 1.1 E-5<br>(0 – ∞)   |  |  |
| HIV                                   | 1.2<br>(0.68 – 2.1)              |                     |                     | 3.1 E-6<br>(0 – ∞)                |                                   |                                   | 3.2 E-6<br>(0 – ∞)                 |                                    |                                    | 4.1 E-6<br>(0 – ∞)   |  |  |
| Autoimmune<br>disease                 | 1.5<br>(0.89 – 2.6)              |                     |                     | <b>4.2</b><br><b>(1.2 – 15.1)</b> | 3.4<br>(0.74 – 15.2)              | 2.9<br>(0.60 – 14.1)              | <b>15.2</b><br><b>(4.0 – 57.8)</b> | <b>14.0</b><br><b>(3.0 – 65.4)</b> | <b>13.5</b><br><b>(2.2 – 82.6)</b> | 1.1 E-5<br>(0 – ∞)   |  |  |
| Body mass<br>index, kg/m <sup>2</sup> |                                  |                     |                     |                                   |                                   |                                   |                                    |                                    |                                    |                      |  |  |
| < 25                                  | 1                                | 1                   | 1                   | 1                                 |                                   |                                   | 1                                  |                                    |                                    | 1                    |  |  |
| 25 – 29                               | <b>1.3</b><br><b>(1.1 – 1.5)</b> | 1.1<br>(0.99 – 1.3) | 1.1<br>(0.98 – 1.3) | 1.3<br>(0.70 – 2.5)               |                                   |                                   | 1.0<br>(0.34 – 3.1)                |                                    |                                    | 0.59<br>(0.10 – 3.5) |  |  |
| ≥ 30                                  | 1.2<br>(0.99 – 1.4)              | 1.1<br>(0.90 – 1.2) | 1.1<br>(0.90 – 1.3) | 1.9<br>(1.0 – 3.8)                |                                   |                                   | 1.9<br>(0.63 – 5.7)                |                                    |                                    | 1.1<br>(0.18 – 6.4)  |  |  |

|           |                                  |                                     |                                   |                                     |                                     |                                     |                                   |  |  |                      |  |  |
|-----------|----------------------------------|-------------------------------------|-----------------------------------|-------------------------------------|-------------------------------------|-------------------------------------|-----------------------------------|--|--|----------------------|--|--|
| Facility  |                                  |                                     |                                   |                                     |                                     |                                     |                                   |  |  |                      |  |  |
| Prison    | 1                                | 1                                   | 1                                 | 1                                   |                                     |                                     | 1                                 |  |  | 1                    |  |  |
| Jail      | 1.1<br>(0.99 – 1.3)              | <b>0.47</b><br><b>(0.38 – 0.58)</b> | 0.46<br>(0.04 – 5.3)              | 0.50<br>(0.24 – 1.0)                |                                     |                                     | 0.27<br>(0.06 – 1.2)              |  |  | 5.1 E-7<br>(0 – ∞)   |  |  |
| Both      | <b>1.4</b><br><b>(1.2 – 1.7)</b> | <b>18.5</b><br><b>(13.0 – 26.2)</b> | 4.9<br>(0.67 – 35.6)              | 1.1<br>(0.51 – 2.3)                 |                                     |                                     | 5.7 E-7<br>(0 – ∞)                |  |  | 5.1 E-7<br>(0 – ∞)   |  |  |
| Housing   |                                  |                                     |                                   |                                     |                                     |                                     |                                   |  |  |                      |  |  |
| Cell      | 1                                | 1                                   | 1                                 | 1                                   | 1                                   | 1                                   | 1                                 |  |  | 1                    |  |  |
| Dormitory | <b>7.4</b><br><b>(6.2 – 8.8)</b> | <b>28.6</b><br><b>(20.8 – 39.4)</b> | <b>35.3</b><br><b>(7.9 – 157)</b> | <b>0.33</b><br><b>(0.16 – 0.66)</b> | <b>0.29</b><br><b>(0.14 – 0.61)</b> | <b>0.22</b><br><b>(0.06 – 0.74)</b> | <b>1.3</b><br><b>(0.27 – 6.3)</b> |  |  | 0.37<br>(0.02 – 5.9) |  |  |
| Both      | <b>4.5</b><br><b>(3.8 – 5.4)</b> | <b>28.4</b><br><b>(20.2 – 39.9)</b> | <b>35.0</b><br><b>(3.3 – 371)</b> | 0.60<br>(0.32 – 1.1)                | <b>0.39</b><br><b>(0.20 – 0.78)</b> | <b>0.30</b><br><b>(0.09 – 0.95)</b> | 2.0<br>(0.45 – 9.3)               |  |  | 1.8<br>(0.21 – 15.8) |  |  |
|           |                                  |                                     |                                   |                                     |                                     |                                     |                                   |  |  |                      |  |  |
|           |                                  |                                     |                                   |                                     |                                     |                                     |                                   |  |  |                      |  |  |

OR = odds ratio; CI = confidence interval; ICU = intensive care unit. Model 1 included the male study population (n = 9,699), since no female inmates tested positive. Models 2 – 4 included SARS-CoV-2 positive individuals only (n = 1,240). Multivariate random-effects models included a random-intercept for facility to account for potential clustering in the data.

FIGURE S1. Inmate SARS-CoV-2 Testing, Connecticut Department of Correction, 2020.

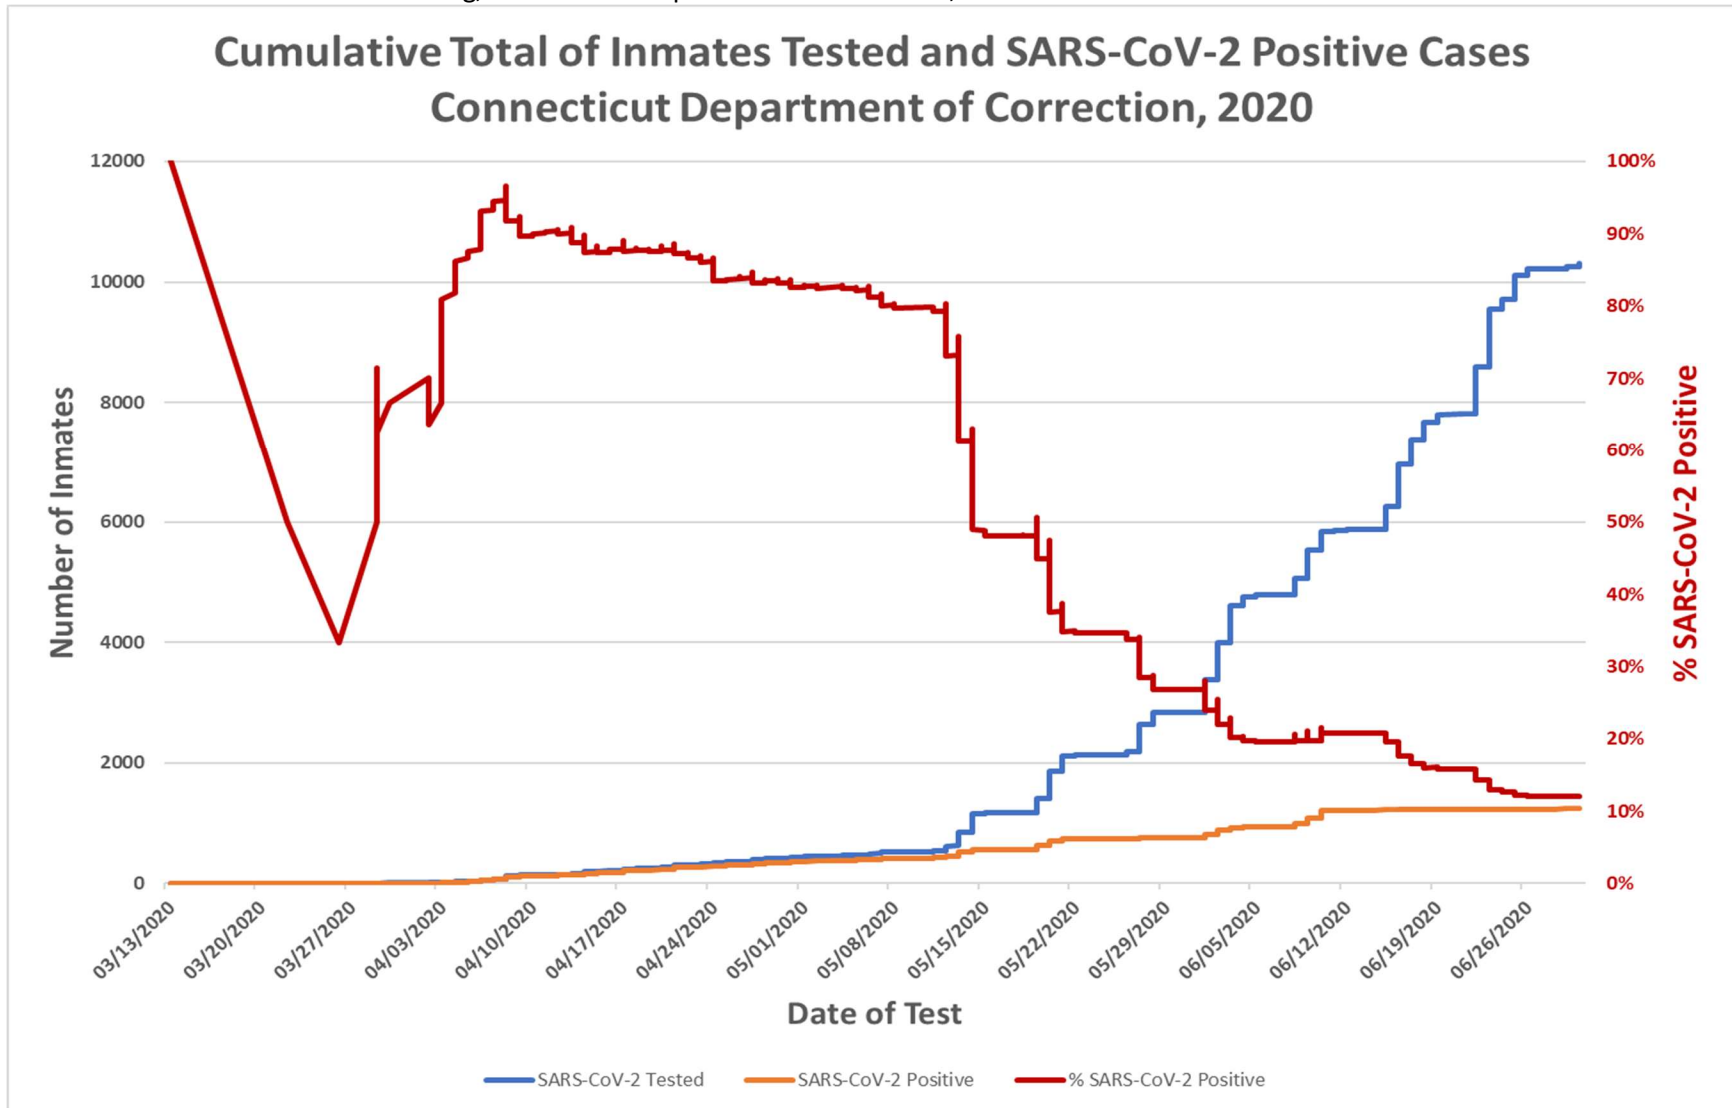

Supplement: NEJMc2029354_appendix.pdf [file NEJMc2029354_appendix.pdf]
